# Supplementary material for: Characterization of PDGF-Induced Subcellular Calcium Regulations through Calcium Channels in Airway Smooth Muscle Cells by FRET Biosensors
Source: Preprints.org preprint supplement (doi:10.20944/preprints202401.2079.v1), 2024-01-30
Supplement: Supplementary file 1 [file supplementary]

Archive with 4 entries (4 files):
- Supplementary materials/Movie S1.avi
- Supplementary materials/Movie S2.avi
- Supplementary materials/Movie S3.avi
- Supplementary materials/Supporting information 2024.01.pdf
