# Supplementary material for: Characterization of PDGF-Induced Subcellular Calcium Regulations through Calcium Channels in Airway Smooth Muscle Cells by FRET Biosensors
Source: Preprints.org preprint supplement (doi:10.20944/preprints202401.2079.v1), 2024-01-30
Supplement: Supplementary file 1 [file supplementary › Supplementary materials/Supporting information 2024.01.pdf]

**Characterization of PDGF-induced subcellular calcium regulations through  
calcium channels in airway smooth muscle cells by FRET biosensors**

Mingxing Ouyang<sup>1,†,\*</sup>, Binqian Zhou<sup>1,2,†</sup>, Jiayue Feng<sup>1</sup>, Qingyu Zhang<sup>1,2</sup>, Chunmei

Li<sup>1,\*</sup>, Linhong Deng<sup>1,\*</sup>

<sup>1</sup>Institute of Biomedical Engineering and Health Sciences, School of Medical and Health Engineering, Changzhou University, Changzhou, 213164 China

<sup>2</sup>School of Pharmacy, Changzhou University, Changzhou, 213164 China

<sup>†</sup>M.O. and B.Z. are co-first authors.

<sup>\*</sup>Corresponding authors.

The supporting information contains one figure and three movies.

**Movie legends:**

**Movie S1.** The time-lapse images of cytosolic calcium FRET in ASM cells before and after PDGF stimulation. The interval is 1 min.

**Movie S2.** The time-lapse images of ER calcium FRET in ASM cells before and after PDGF stimulation. The interval is 1 min.

**Movie S3.** The time-lapse images of calcium FRET on the outer mitochondrial membrane in ASM cells before and after PDGF stimulation. The interval is 1 min.

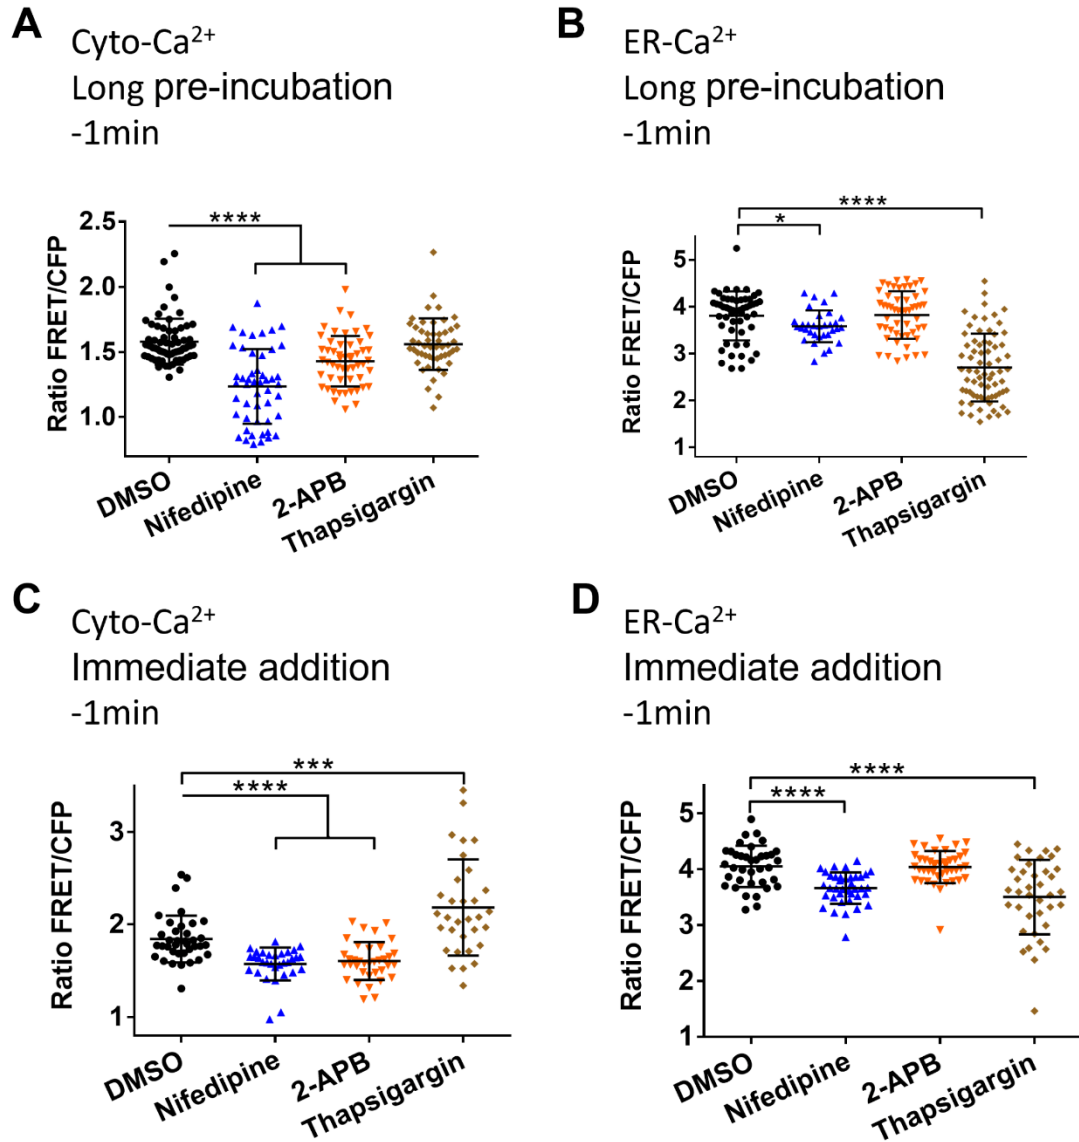

**Figure S1. The basal level comparisons of calcium FRET in cell cytosol or endoplasmic reticulum (ER) after the inhibitors' treatments but before PDGF stimulations. (A, B) The calcium FRET levels in the cytosol (A) or ER (B) after one hour pre-incubations with DMSO, nifedipine, 2-APB, or thapsigargin. (C, D) The calcium FRET levels in the cytosol (C) or ER (D) from immediate addition of DMSO, nifedipine, 2-APB, or thapsigargin before moved to microscopic imaging.**
